# Supplementary material for: Coconut Water: A Sports Drink Alternative?
Source: MDPI journal article supplement (doi:10.3390/sports11090183), 2023-09-14
Supplement: s1 [file s1]

**Supplementary Table S1.** Preload physiological variable data.

|               |                                       | Before preload | 30 min    | 60 min    | 85 min    |
|---------------|---------------------------------------|----------------|-----------|-----------|-----------|
| Sports Drink  | Heart rate (b·min <sup>-1</sup> )     |                | 151 ± 15  | 149 ± 12  | 148 ± 16  |
|               | Blood lactate (mmol·L <sup>-1</sup> ) | 2.0 ± 0.8      | 4.5 ± 3.1 | 4.2 ± 2.9 | 3.6 ± 3.1 |
|               | Blood glucose (mmol·L <sup>-1</sup> ) | 5.1 ± 0.8      | 5.6 ± 1   | 5.7 ± 0.9 | 5.5 ± 0.8 |
| Coconut drink | Heart rate (b·min <sup>-1</sup> )     |                | 151 ± 20  | 151 ± 19  | 150 ± 19  |
|               | Blood lactate (mmol·L <sup>-1</sup> ) | 1.8 ± 1        | 4.8 ± 3.6 | 3.7 ± 2.1 | 3.9 ± 2.7 |
|               | Blood Glucose (mmol·L <sup>-1</sup> ) | 5.2 ± 0.8      | 5.2 ± 0.8 | 5.4 ± 0.9 | 5.5 ± 0.8 |
